# Supplementary material for: Dietary Supplementation of Aspirin Promotes Drosophila Defense against Viral Infection
Source: MDPI journal article supplement (doi:10.3390/molecules28145300), 2023-07-09
Supplement: s1 [file s1]

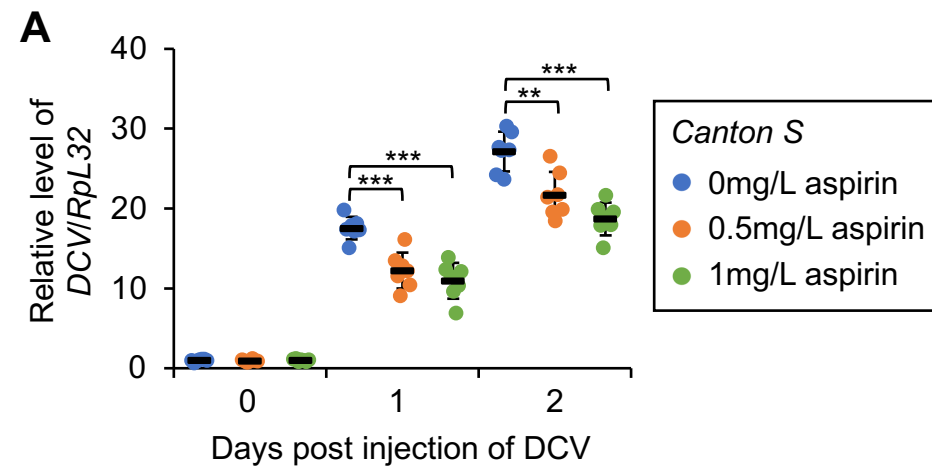

**Figure S1. Dietary supplementation of aspirin limits DCV load in *Canton S* flies.**

(A) Male *Canton S* adults were raised on standard fly medium supplemented with or without aspirin as indicated. Flies were infected with DCV, followed by RT-qPCR assays to monitor the viral load at indicated time points. Data are shown as mean plus standard errors. Each dot represents one independent replicate. \*\*,  $p < 0.01$ ; \*\*\*,  $p < 0.001$ .
